# Supplementary material for: Photosensitizer Micelles Together with IDO Inhibitor Enhance Cancer Photothermal Therapy and Immunotherapy
Source: PubMed Central journal article supplement (PMC5979747; doi:10.1002/advs.201700891), 2018-02-26
Supplement: ADVS-5-1700891-s001.pdf [file ADVS-5-1700891-s001.pdf]

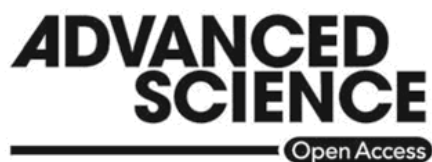

## Supporting Information

for *Adv. Sci.*, DOI: 10.1002/advs.201700891

Photosensitizer Micelles Together with IDO Inhibitor Enhance  
Cancer Photothermal Therapy and Immunotherapy

*Jinrong Peng, Yao Xiao, Wenting Li, Qian Yang, Liwei Tan,  
Yanpeng Jia, Ying Qu, and Zhiyong Qian\**

## Supporting Information

### **Photosensitizer micelles together with IDO inhibitor enhance cancer photothermal therapy and immunotherapy**

*Jinrong Peng, Yao Xiao, Wenting Li, Qian Yang, Liwei Tan, Yanpeng Jia, Ying Qu, Zhiyong Qian\**

Dr. Jinrong Peng, Yao Xiao, Yanpeng Jia, Dr. Ying Qu, Prof. Zhiyong Qian  
Stake Key Laboratory of Biotherapy/Collaborative Innovation Center of Biotherapy, West  
China Hospital, Sichuan University, Chengdu, Sichuan, PR China  
E-mail: [anderson-qian@163.com](mailto:anderson-qian@163.com)

Dr. Qian Yang

School of Pharmacy, Chengdu Medical College, No. 783, Xindu Avenue, Xindu District,  
Chengdu, 610500, Sichuan, P. R. China

Dr. Wenting Li and Dr. Liwei Tan

Department of Pharmacy, West China Second University Hospital, No. 20, People's Southern  
Road, Chengdu, 610041

**Keywords:** nanoparticle, ineffective photothermal therapy, IDO inhibitor, immunotherapy,  
combinational therapy

Figure S1

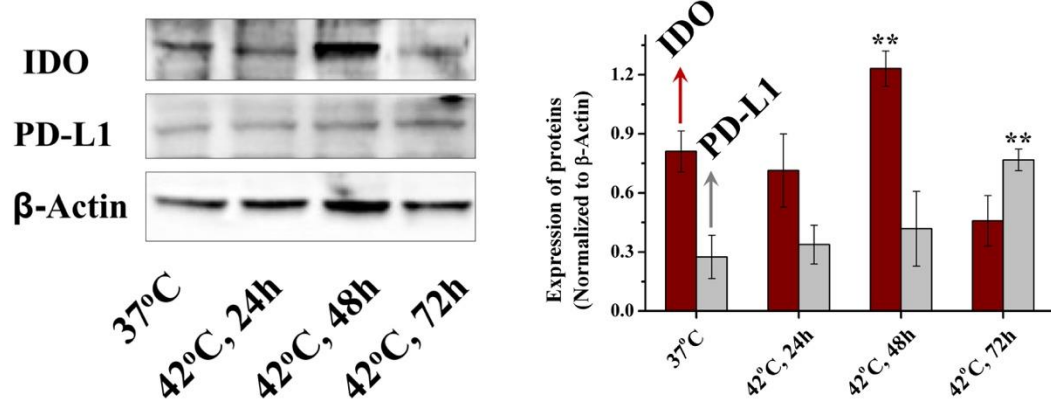

Figure S1 the duration time of up-regulated proteins (IDO, PD-L1) after heat treatment.

Figure S2

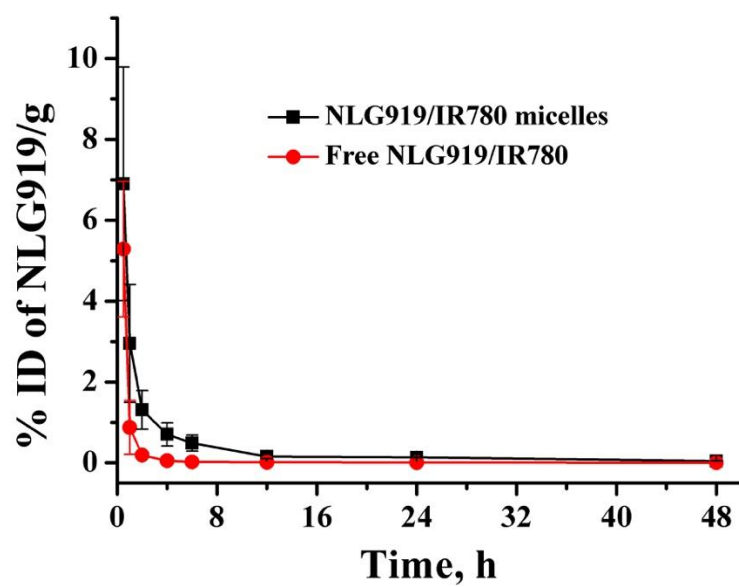

**Figure S2** the pharmacokinetic profiles of NLG919/IR780 micelles and free form NLG919/IR780, respectively.

## Raw data of western blotting

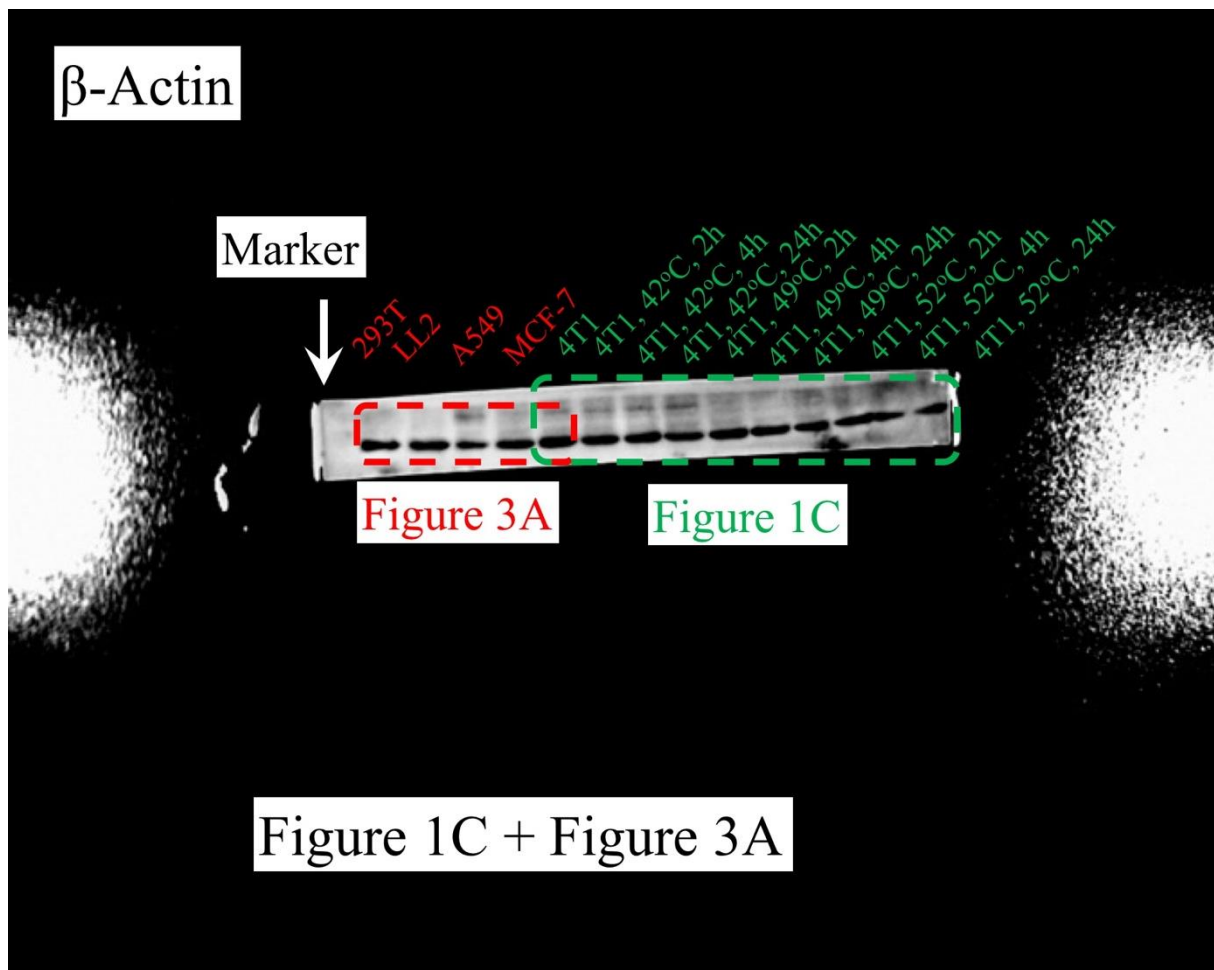

**Supplementary Figure 1.** The raw data of Figure 1C and Figure 3A, evaluated by western blotting. In here, the image of actin was listed and marked. The other images were uploaded as separated images. In order to obtain desired imaging quality, we have cutted the gels of the target proteins from the whole gels for imaging. The expression levels of each protein were normalized to  $\beta$ -actin, and listed in figure 3B, and Figure 1D and 1E, respectively.

## Raw data of western blotting

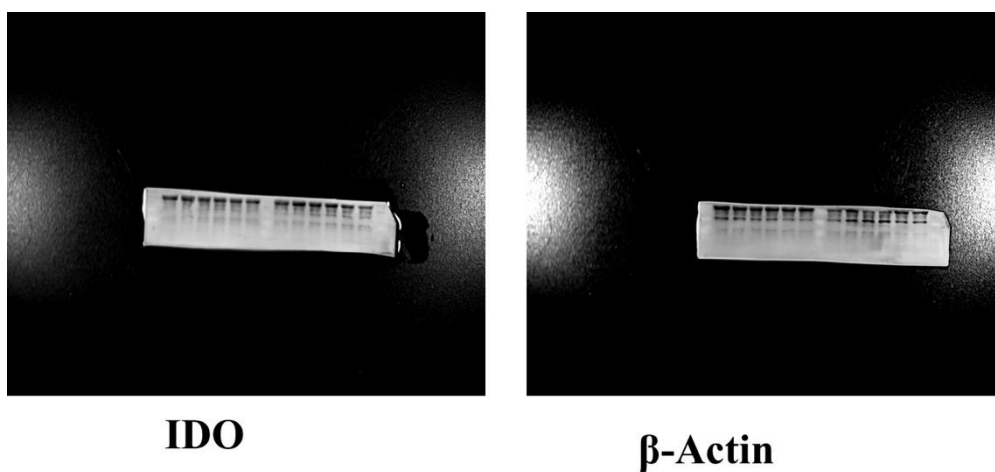

**Supplementary Figure 2.** The expressions of IDO, Actin of 4T1 cells, after co-culturing with different concentrations of NLG919 micelles, respectively, evaluated by western blotting. (Figure 3E)

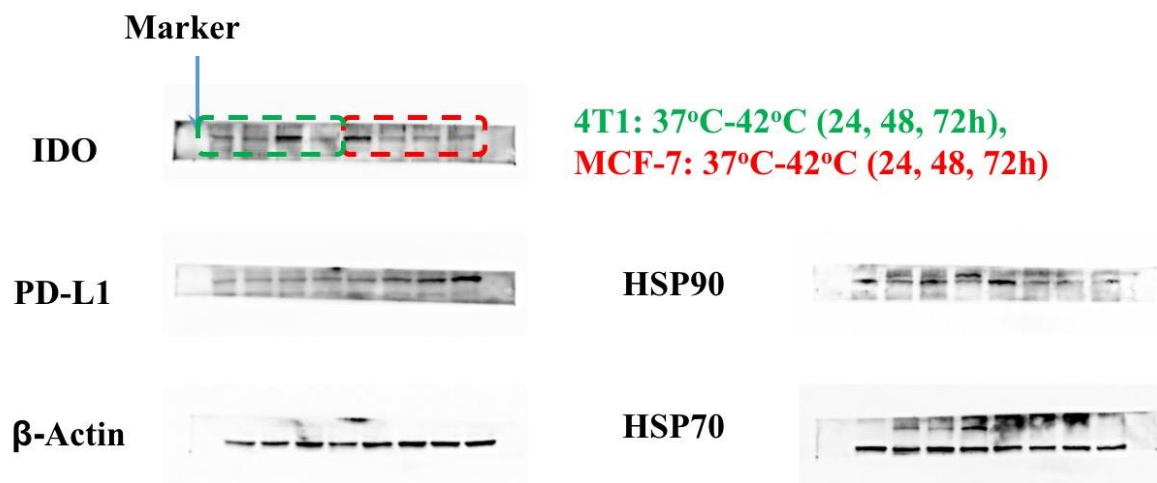

**Supplementary Figure 3.** The raw data of Figure S 1. the duration time of up-regulated proteins (IDO, PD-L1) after heat treatment.
